# Supplementary figures and images for: Confronting the complexity of CNT materials
Source: Royal Society of Chemistry journal article supplement (doi:10.1039/c5sm00912j), 2015-01-01

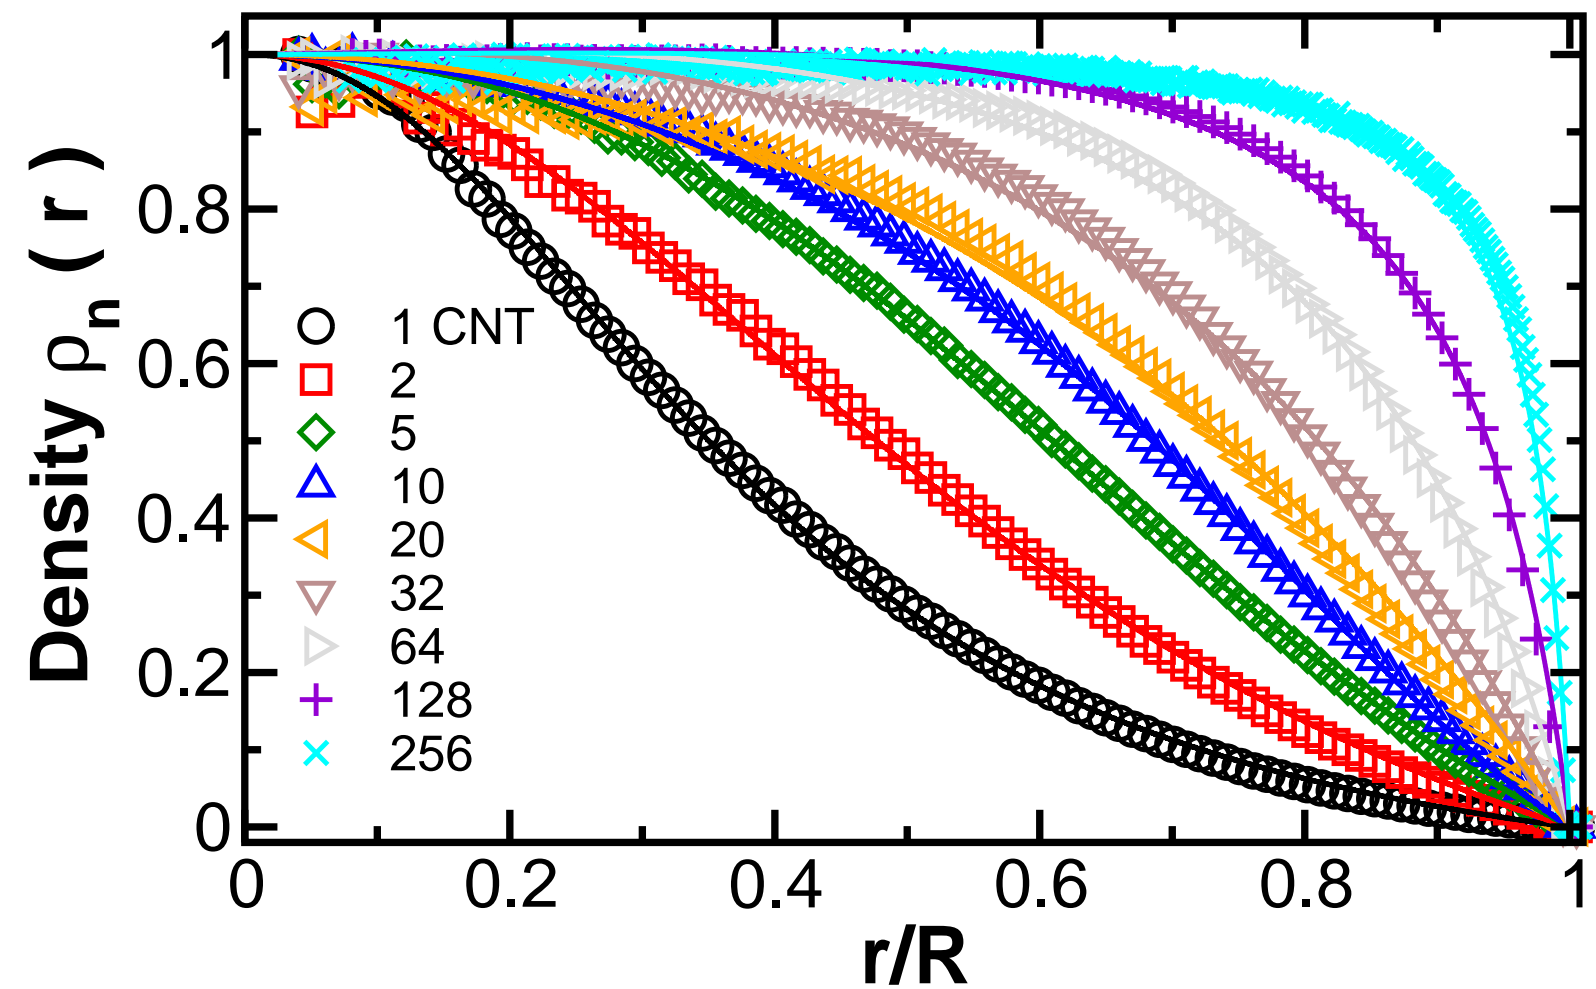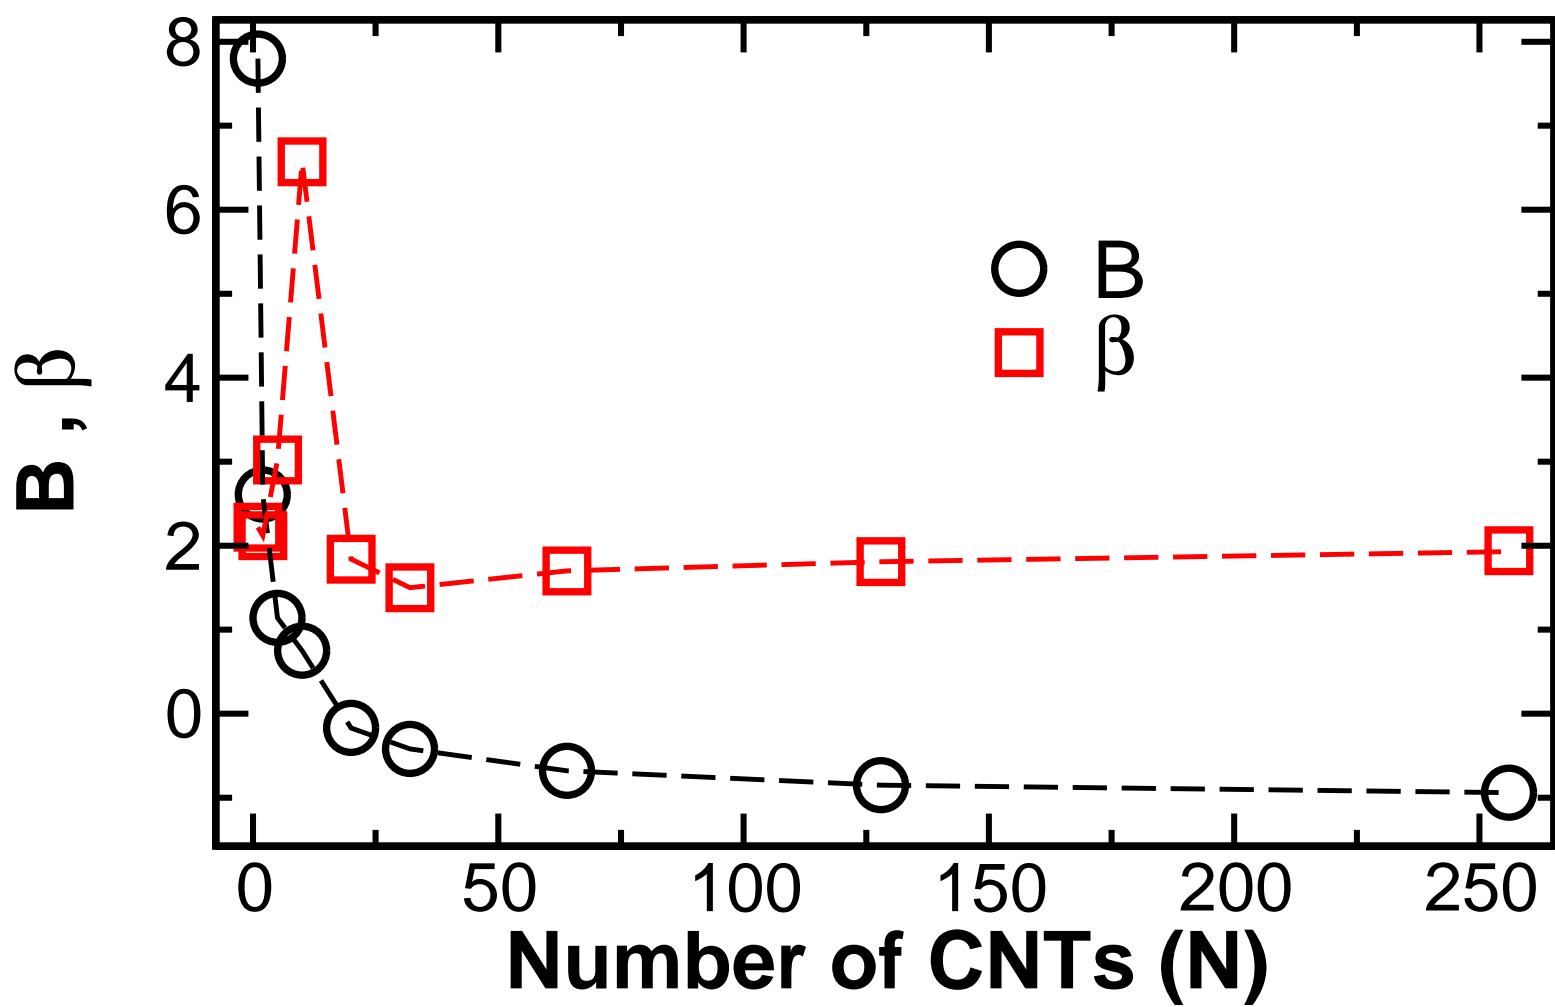

Supplement: c5sm00912j1.zip [file c5sm00912j1.zip]
